# Supplementary material for: Effect of Obstructive Sleep Apnea and CPAP Treatment on the Bioavailability of Erythrocyte and Plasma Nitric Oxide
Source: MDPI journal article supplement (doi:10.3390/ijerph192214719), 2022-11-09
Supplement: s1 [file s1]

**Supplementary Table S1.** Baseline characteristics of subjects before and after 1 year of CPAP.

|                                              | OSA group before CPAP treatment |   |         | OSA group after 1 year of CPAP treatment |   |          | p value |
|----------------------------------------------|---------------------------------|---|---------|------------------------------------------|---|----------|---------|
| Parameter                                    | Mean ± SD                       |   |         | Mean ± SD                                |   |          |         |
| Age [years]                                  | 54.90                           | ± | 7.52    | 55.90                                    | ± | 7.50     | p<0.05  |
| BMI [kg/m²]                                  | 28.22                           | ± | 2.72    | 28.48727                                 | ± | 2.587217 | NS      |
| WBC [k/μL]                                   | 7.21                            | ± | 1.91    | 7.00                                     | ± | 3.34     | NS      |
| RBC [mln/μL]                                 | 5.19                            | ± | 0.34    | 5.08                                     | ± | 0.27     | NS      |
| Hb [g/dL]                                    | 15.56                           | ± | 0.81    | 15.27                                    | ± | 0.73     | NS      |
| Ht [%]                                       | 46.39                           | ± | 2.29    | 44.66                                    | ± | 2.08     | NS      |
| MCV [fL]                                     | 89.52                           | ± | 3.83    | 87.97                                    | ± | 4.20     | NS      |
| MCH [pg]                                     | 30.00                           | ± | 0.75    | 29.96                                    | ± | 1.27     | NS      |
| PLT [k/μL]                                   | 212.30                          | ± | 41.31   | 230.10                                   | ± | 61.81    | NS      |
| HbA1c [%]                                    | 5.63                            | ± | 0.35    | 5.74                                     | ± | 0.63     | NS      |
| ALT [U/L]                                    | 28.10                           | ± | 7.00    | 25.75                                    | ± | 2.22     | NS      |
| LDL [mg/dL]                                  | 133.10                          | ± | 24.80   | 113.80                                   | ± | 32.55    | NS      |
| Total cholesterol [mg/dL]                    | 217.80                          | ± | 35.85   | 192.67                                   | ± | 35.52    | NS      |
| HDL [mg/dL]                                  | 52.20                           | ± | 17.09   | 47.67                                    | ± | 12.11    | NS      |
| Triglycerides [mg/dL]                        | 162.40                          | ± | 80.60   | 166.67                                   | ± | 145.42   | NS      |
| hsCRP [mg/L]                                 | 4.58                            | ± | 7.73    | 2.65                                     | ± | 3.54     | NS      |
| TSH [μLU/mL]                                 | 1.72                            | ± | 1.13    | 1.06                                     | ± | 0.28     | NS      |
| Creatinine [mg/dL]                           | 1.07                            | ± | 0.19    | 1.01                                     | ± | 0.13     | NS      |
| eGFR [mL/min/1,73m²]                         | 79.00                           | ± | 15.53   | 83.17                                    | ± | 13.08    | NS      |
| Uric acid [mg/dL]                            | 6.69                            | ± | 1.16    | 6.37                                     | ± | 0.98     | NS      |
| Urea [mg/dL]                                 | 35.70                           | ± | 9.44    | 33.17                                    | ± | 4.07     | NS      |
| Mg [mmol/L]                                  | 2.15                            | ± | 0.11    | 1.98                                     | ± | 0.12     | NS      |
| K [mmol/L]                                   | 4.24                            | ± | 0.26    | 4.26                                     | ± | 0.24     | NS      |
| Na [mmol/L]                                  | 141.90                          | ± | 1.66    | 141.00                                   | ± | 1.41     | NS      |
| Ca [mmol/L]                                  | 9.28                            | ± | 0.17    | 9.55                                     | ± | 0.15     | NS      |
| Glucose [mg/dL]                              | 101.40                          | ± | 9.99    | 103.33                                   | ± | 11.68    | NS      |
| Insulin [uU/mL]                              | 9.47                            | ± | 5.37    | 10.71                                    | ± | 4.95     | NS      |
| HOMA-IR                                      | 2.40274                         | ± | 1.37291 | 2.85701                                  | ± | 1.631927 | NS      |
| AHI [events/h]                               | 34.12                           | ± | 14.11   | 2.55000                                  | ± | 2.05061  | p<0,05  |
| ODI [events/h]                               | 33.10                           | ± | 13.81   | 2.61000                                  | ± | 2.10050  | p<0,05  |
| Mean Saturation [%]                          | 92.86                           | ± | 1.50    | 94.00000                                 | ± | 2.01384  | p<0,05  |
| Desaturation <90%<br>[% of total sleep time] | 7.71                            | ± | 6.00    | 0.24000                                  | ± | 0.20258  | p<0,05  |

*Abbreviations:* NS: result statistically non-significant; BMI: body mass index; RBC: red blood cells; WBC: white blood cells; MCV: mean [red blood] cell volume; MCH: mean corpuscular hemoglobin; MCHC: mean corpuscular hemoglobin concentration; PLT: platelets; eGFR: estimated glomerular filtration rate; HbA1c: Glycated hemoglobin; HOMA-IR: Homeostatic Model Assessment of Insulin Resistance; HDL: high-density lipoprotein; LDL: low-density lipoprotein; hsCRP: high-sensitivity C-reactive protein; TSH: thyroid-stimulating hormone; AHI: apnea-hypopnea index; ODI: oxygen desaturation index; Hb: hemoglobin; Ht: hematocrit.
